# Supplementary material for: Electrical stimulation drives chondrogenesis of mesenchymal stem cells in the absence of exogenous growth factors
Source: PubMed Central journal article supplement (PMC5177962; doi:10.1038/srep39302), 2016-12-22
Supplement: srep39302-s1.pdf [file srep39302-s1.pdf]

# **Electrical stimulation drives chondrogenesis of mesenchymal stem cells in the absence of exogenous growth factors**

**Hyuck Joon Kwon<sup>1\*</sup>, Gyu Seok Lee<sup>2</sup>, and Honggu Chun<sup>3\*</sup>**

<sup>1</sup>Department of Physical Therapy and Rehabilitation, College of Health Science, Eulji University, Gyeonggi, Korea

<sup>2</sup>Department of Microbiology and Molecular Biology, College of Bioscience and Biotechnology, Chungnam National University, Daejeon, Republic of Korea

<sup>3</sup>Department of Bio-convergence Engineering, Korea University, Seoul, Korea,

\*kwonhj@eulji.ac.kr, \*chunhonggu@korea.ac.kr

**SUPPLEMENTARY FIG.S1.**

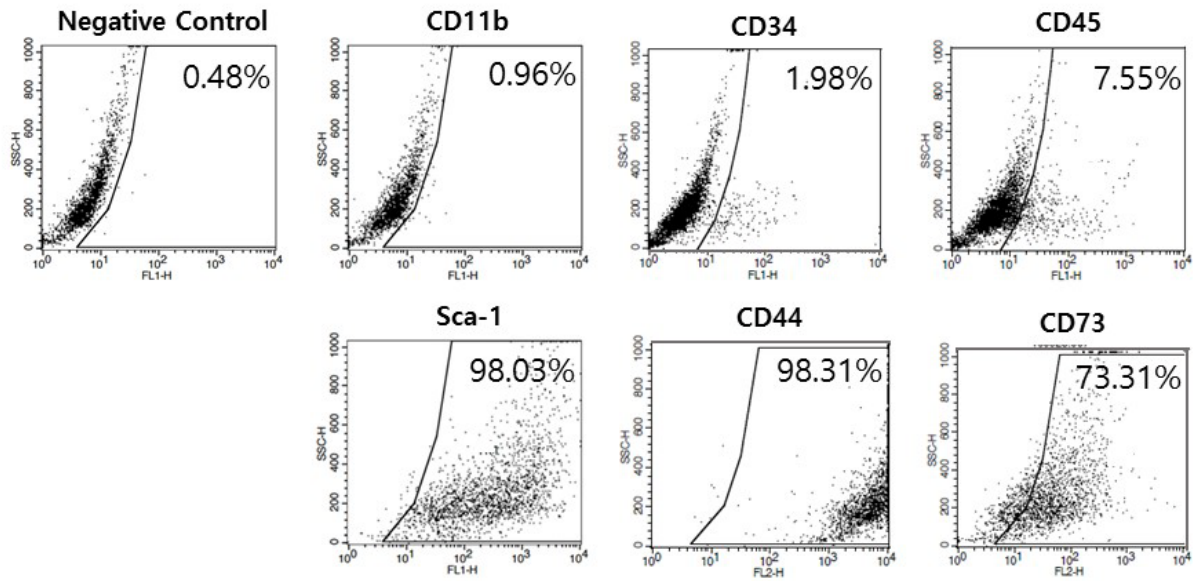

**FIG. S1.** Representative FACS dot plots showing the expression of CD11b, CD34, CD45, Sca-1, CD44 and CD73 in MSCs.

**SUPPLEMENTARY FIG.S2.**

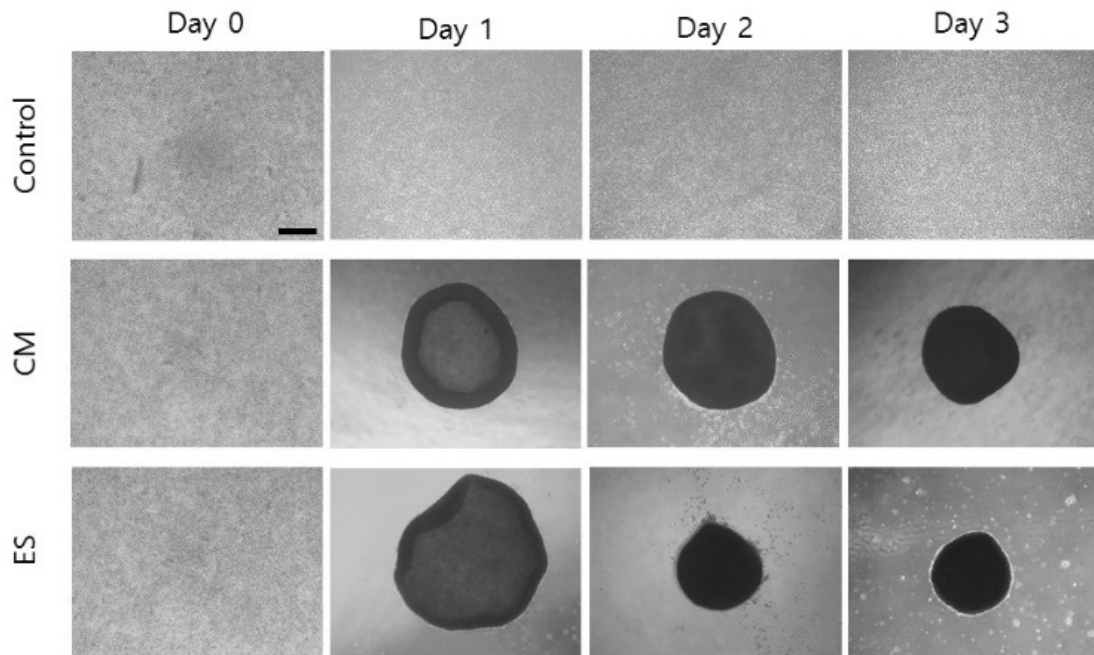

**FIG. S2.** Time-course observations of condensation behaviours of MSCs in micromass culture were examined with phase contrast images during culture for 3 days in maintenance medium (control), chondrogenic medium (CM) and maintenance medium under ES (ES), respectively. Scale bars, 500  $\mu\text{m}$ .

**SUPPLEMENTARY FIG.S3.**

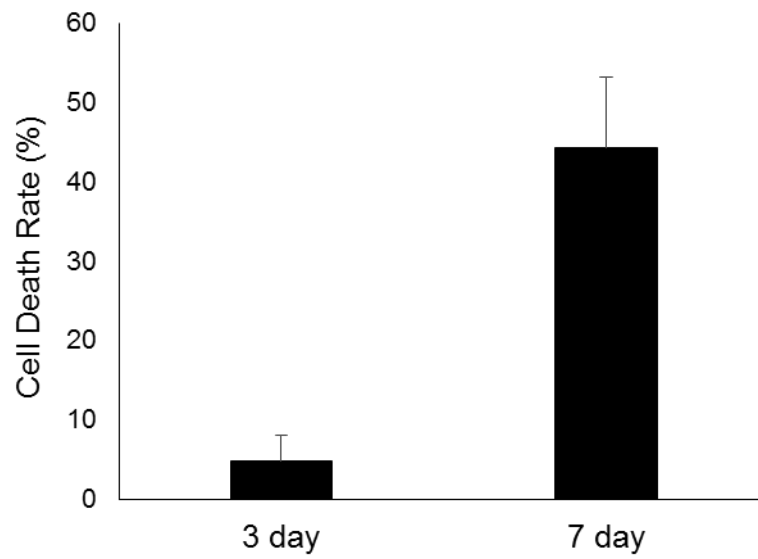

**FIG. S3.** Lactate dehydrogenase (LDH) leakage assay was performed for assessing the cytotoxicity of ES after 3 and 7 days under ES, respectively. Bars represent the mean  $\pm$  SD of measurements from four micromass culture sets.
